# Supplementary material for: Geographical accessibility of emergency neonatal care services in Ethiopia: analysis using the 2016 Ethiopian Emergency Obstetric and Neonatal Care Survey
Source: HighWire-hosted journal article supplement (doi:10.1136/bmjopen-2021-058648), 2022-06-01
Supplement: bmjopen-2021-058648supp001_data_supplement.pdf [file bmjopen-2021-058648supp001_data_supplement.pdf]

Appendix 1: Geographic access coverage of fully emergency neonatal care services considering travel scenarios of the maximum allowed driving speed and 25% lower than the maximum allowed driving speed.

| Region name      | % Access coverage           |                                    |
|------------------|-----------------------------|------------------------------------|
|                  | Maximum travel time assumed | 25% lower than maximum travel time |
| Addis Ababa      | 100.0                       | 100.0                              |
| Afar             | 13.5                        | 15.3                               |
| Amhara           | 45.1                        | 48.7                               |
| Beneshangul Gumu | 33.3                        | 32.2                               |
| Dire Dawa        | 95.8                        | 95.5                               |
| Gambela          | 43.3                        | 43.4                               |
| Hareri           | 100.0                       | 99.9                               |
| Oromia           | 41.6                        | 43.3                               |
| Somali           | 10.9                        | 16.3                               |
| SNNPR            | 53.4                        | 55.3                               |
| Tigray           | 56.0                        | 60.0                               |
